# Supplementary material for: Shape programming and photoactuation of interpenetrating polymer networks containing azobenzene moieties
Source: Royal Society of Chemistry journal article supplement (doi:10.1039/d2tc04067k), 2022-11-30
Supplement: d2tc04067k1.pdf [file d2tc04067k1.pdf]

Electronic Supplementary Information

# Shape programming and photoactuation of interpenetrating polymer networks containing azobenzene moieties

T. Ube, K. Naito and T. Ikeda

## Supplementary Figures

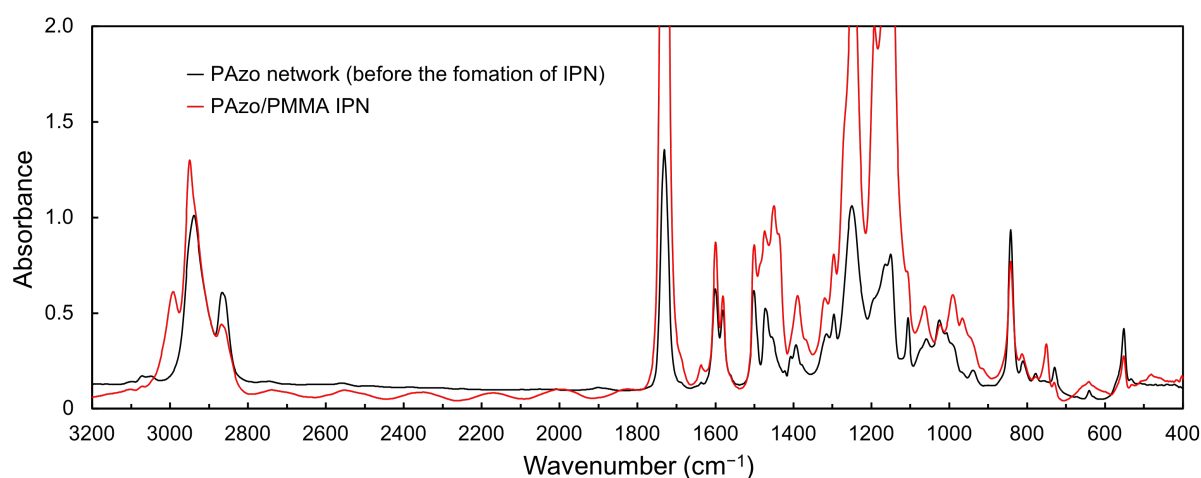

**Fig. S1** FTIR spectra of PAzo network (before the formation of IPN) and IPN films in transmission mode.

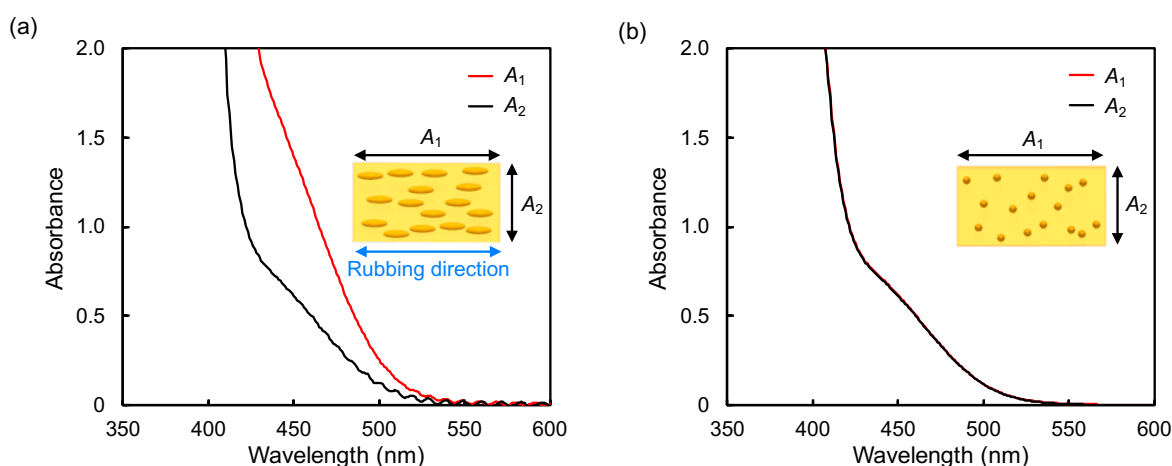

**Fig. S2** Polarized absorption spectra of IPN films with (a) in-plane uniaxial and (b) homeotropic alignment of mesogens. Orientational order parameter,  $S$ , of azobenzene moieties was evaluated as  $S = (A_1 - A_2) / (A_1 + 2A_2)$ , where  $A_1$  and  $A_2$  represent absorbance obtained with incident light polarized parallel and perpendicular to the alignment direction, respectively: (a)  $S = 0.30$ , and (b)  $S = 0$ . Thickness of the films: 8  $\mu\text{m}$ .

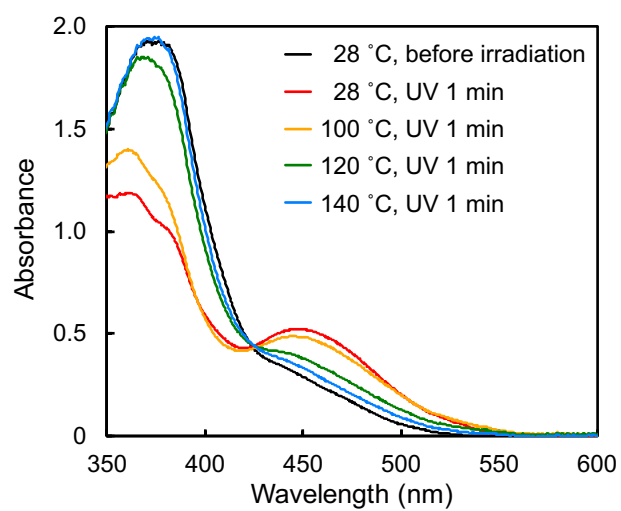

**Fig. S3** Real-time absorption spectra of a PAzo/PMMA IPN film under irradiation with UV light (365 nm, 15 mW cm<sup>-2</sup>) at various temperatures. Thickness of the film: 3 μm.
